# Supplementary material
Source: MDPI journal article supplement (https://www.mdpi.com/2073-4352/11/1/18)
Supplement: s1 [file s1]

# Supplementary material

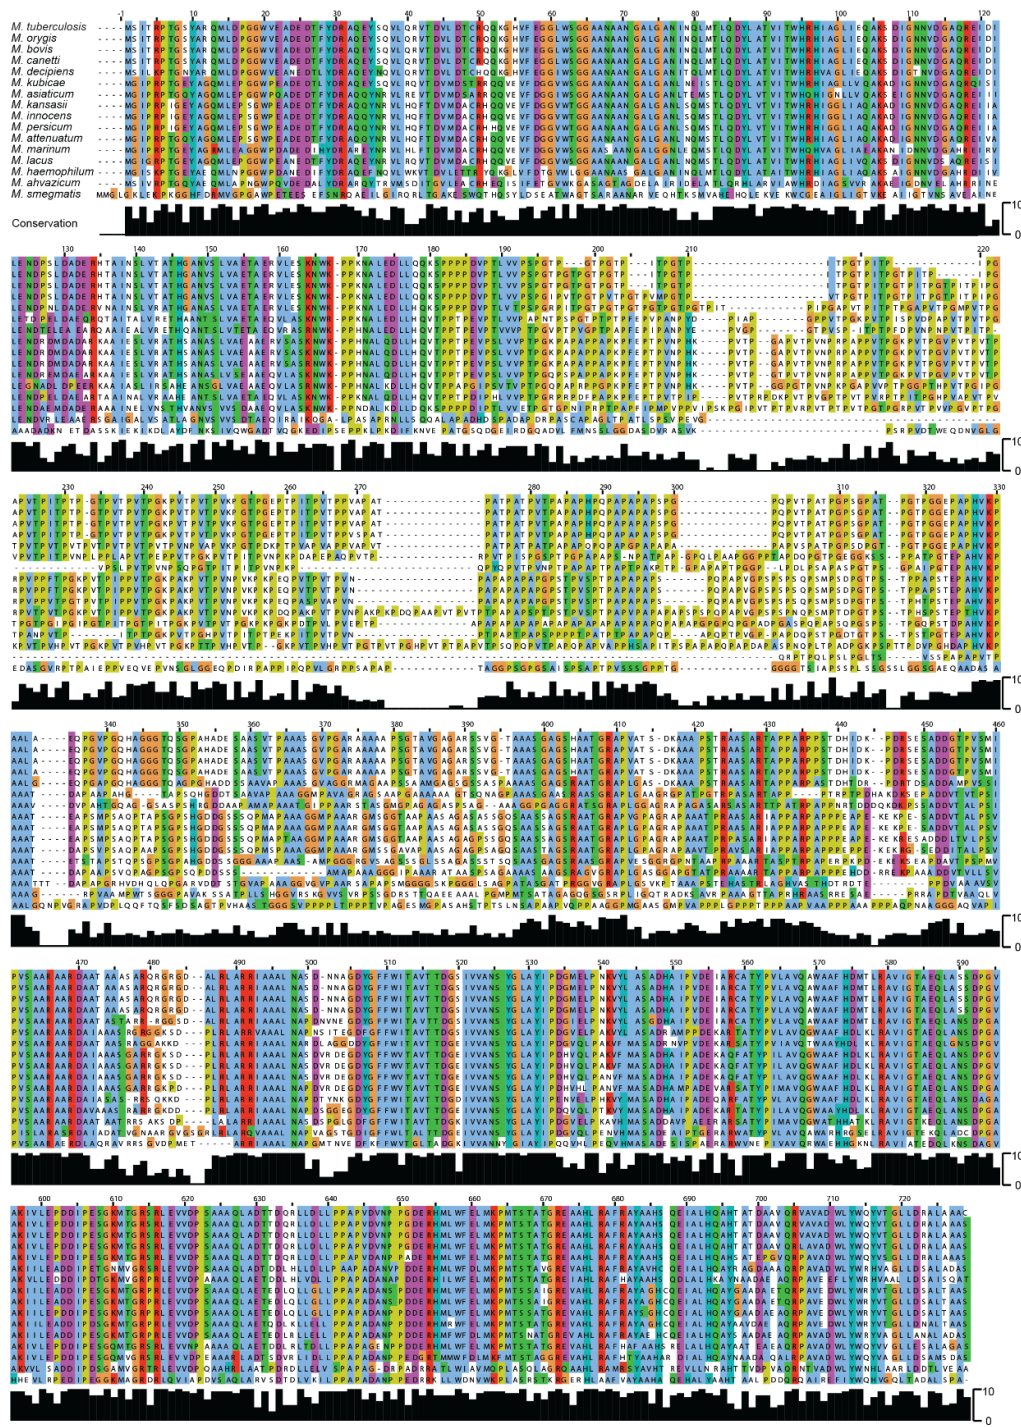

Supplementary Figure 1. Sequence alignment of EspK from different mycobacterial species. Numbering is based on the sequence of *M. tuberculosis*. Conservation score ranges from 0 (no conservation) to 10 (invariant). Colour scheme of ClustalX is used.

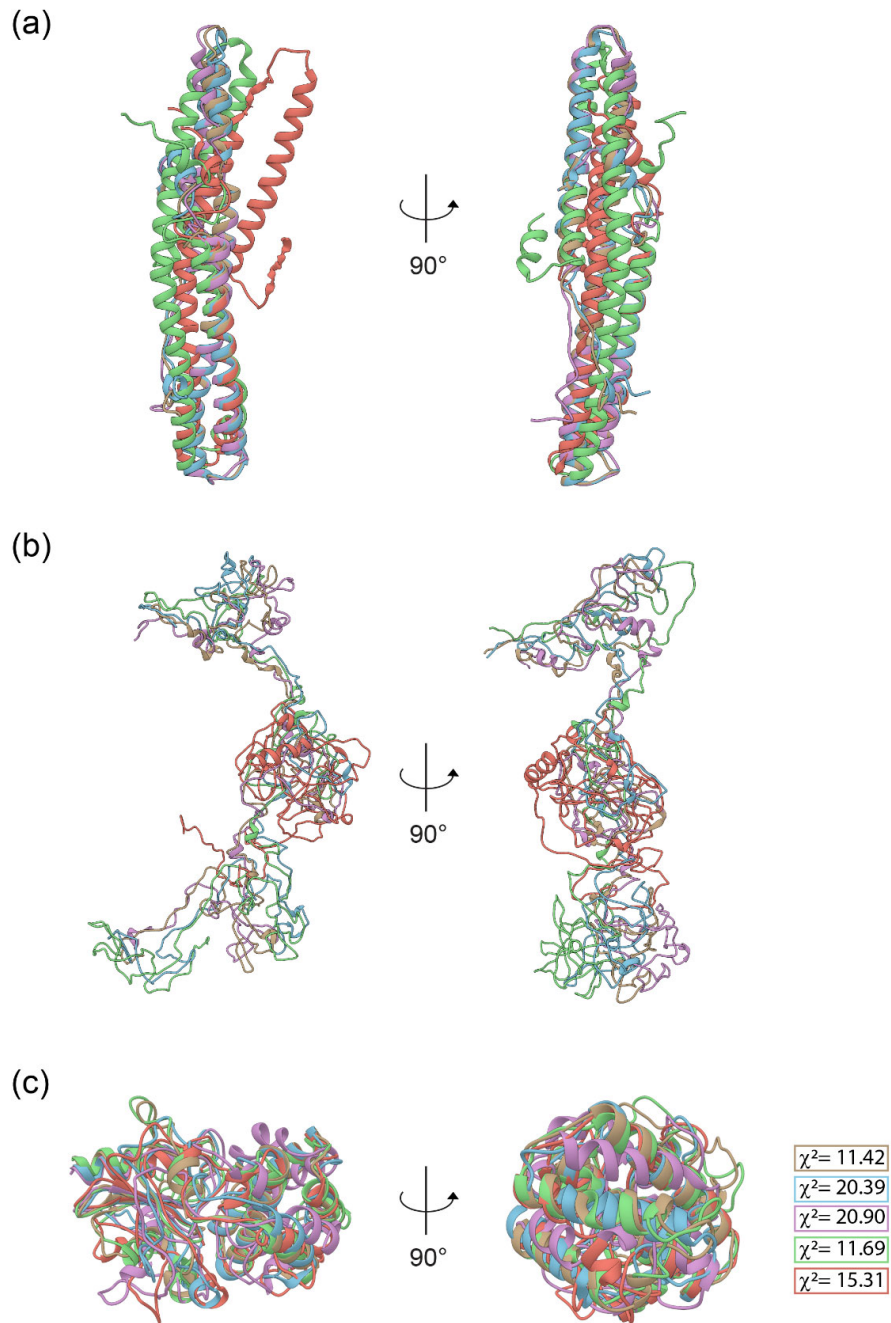

**Supplementary Figure 2. Tertiary structure prediction of the different regions of EspK by I-TASSER.** Top five models predicted for the N-terminal domain (a), the middle region (b) and the C-terminal domain (c). Each model is represented by different colour.  $\chi^2$  represents the correlation between the experimental SAXS data and that calculated for the different I-TASSER models of EspK C-terminal domain.
